# Supplementary material for: Aetiology of Type 2 diabetes in people with a ‘normal’ body mass index: testing the personal fat threshold hypothesis
Source: PubMed Central journal article supplement (PMC10472166; doi:10.1042/cs20230586), 2023-08-31
Supplement: CS-2023-0586_supp.pdf [file CS-2023-0586_supp.pdf]

## SUPPLEMENTARY MATERIAL

STROBE Statement—checklist of items that should be included in reports of observational studies

|                              | Item No. | Recommendation                                                                                                                                                                             | Page No. [lines]             | Relevant text from manuscript                              |
|------------------------------|----------|--------------------------------------------------------------------------------------------------------------------------------------------------------------------------------------------|------------------------------|------------------------------------------------------------|
| <b>Title and abstract</b>    | 1        | (a) Indicate the study's design with a commonly used term in the title or the abstract                                                                                                     | 2 [50-53]                    | ...in a cohort ...                                         |
|                              |          | (b) Provide in the abstract an informative and balanced summary of what was done and what was found                                                                                        | 2 [51-60]                    | To test this hypothesis ...                                |
| <b>Introduction</b>          |          |                                                                                                                                                                                            |                              |                                                            |
| Background/rationale         | 2        | Explain the scientific background and rationale for the investigation being reported                                                                                                       | 3 [68-84]                    | ... the underlying....                                     |
| Objectives                   | 3        | State specific objectives, including any prespecified hypotheses                                                                                                                           | 4 [85-90]                    | The Reversal of Type 2 diabetes ...                        |
| <b>Methods</b>               |          |                                                                                                                                                                                            |                              |                                                            |
| Study design                 | 4        | Present key elements of study design early in the paper                                                                                                                                    | 4 [104-111]                  | As monogenic ....                                          |
| Setting                      | 5        | Describe the setting, locations, and relevant dates, including periods of recruitment, exposure, follow-up, and data collection                                                            | 4 [93-103]                   | Participants with T2D of <6 years ...were recruited by.... |
| Participants                 | 6        | (a) <i>Cohort study</i> —Give the eligibility criteria, and the sources and methods of selection of participants. Describe methods of follow-up                                            | 4 [109-111] &<br>4 [118-119] | The cohort of ....                                         |
|                              |          | <i>Case-control study</i> —Give the eligibility criteria, and the sources and methods of case ascertainment and control selection. Give the rationale for the choice of cases and controls |                              | were supervised by one-to-one contact .....                |
|                              |          | <i>Cross-sectional study</i> —Give the eligibility criteria, and the sources and methods of selection of participants                                                                      |                              |                                                            |
|                              |          | (b) <i>Cohort study</i> —For matched studies, give matching criteria and number of exposed and unexposed                                                                                   | 4 [96-97]                    | normoglycemic control participants with no family....      |
|                              |          | <i>Case-control study</i> —For matched studies, give matching criteria and the number of controls per case                                                                                 |                              |                                                            |
| Variables                    | 7        | Clearly define all outcomes, exposures, predictors, potential confounders, and effect modifiers. Give diagnostic criteria, if applicable                                                   | 4[122-165]                   | Diary-based total dietary....                              |
| Data sources/<br>measurement | 8*       | For each variable of interest, give sources of data and details of methods of assessment (measurement). Describe comparability of assessment methods if there is more than one group       | 4[122-165]                   | Diary-based total dietary....                              |
| Bias                         | 9        | Describe any efforts to address potential sources of bias                                                                                                                                  | 4[104-108]                   | As monogenic and autoimmune.....                           |
| Study size                   | 10       | Explain how the study size was arrived at                                                                                                                                                  | 6 [167-191]                  | Power calculation: The study was powered .....             |

|                        |     |                                                                                                                                                                                                                    |                                               |                                                                               |
|------------------------|-----|--------------------------------------------------------------------------------------------------------------------------------------------------------------------------------------------------------------------|-----------------------------------------------|-------------------------------------------------------------------------------|
| Quantitative variables | 11  | Explain how quantitative variables were handled in the analyses. If applicable, describe which groupings were chosen and why                                                                                       | 6 [180-182]                                   | Analyses were conducted .....                                                 |
| Statistical methods    | 12  | (a) Describe all statistical methods, including those used to control for confounding                                                                                                                              | 6 [180-182]                                   | Power calculation: ....                                                       |
|                        |     | (b) Describe any methods used to examine subgroups and interactions                                                                                                                                                |                                               |                                                                               |
|                        |     | (c) Explain how missing data were addressed                                                                                                                                                                        | 7 [190-112]                                   | Missing data are indicated .....                                              |
|                        |     | (d) <i>Cohort study</i> —If applicable, explain how loss to follow-up was addressed                                                                                                                                | 7 [190-112]                                   | Missing data are indicated .....                                              |
|                        |     | <i>Case-control study</i> —If applicable, explain how matching of cases and controls was addressed<br><i>Cross-sectional study</i> —If applicable, describe analytical methods taking account of sampling strategy |                                               |                                                                               |
|                        |     | (e) Describe any sensitivity analyses                                                                                                                                                                              |                                               |                                                                               |
| <b>Results</b>         |     |                                                                                                                                                                                                                    |                                               |                                                                               |
| Participants           | 13* | (a) Report numbers of individuals at each stage of study—eg numbers potentially eligible, examined for eligibility, confirmed eligible, included in the study, completing follow-up, and analysed                  | 4 [109-110] & in Figures + Tables pages 18-24 | The cohort of 20 ...                                                          |
|                        |     | (b) Give reasons for non-participation at each stage                                                                                                                                                               | 7 [5188-190]                                  | Three participants were recruited...                                          |
|                        |     | (c) Consider use of a flow diagram                                                                                                                                                                                 |                                               |                                                                               |
| Descriptive data       | 14* | (a) Give characteristics of study participants (eg demographic, clinical, social) and information on exposures and potential confounders                                                                           | 7 [195-204] & [202-203] + Table 1             | At baseline, there were 20 individuals ..... & They were 58.0±10.5 years .... |
|                        |     | (b) Indicate number of participants with missing data for each variable of interest                                                                                                                                | 17-23 in Figures & Tables                     |                                                                               |
|                        |     | (c) <i>Cohort study</i> —Summarise follow-up time (eg, average and total amount)                                                                                                                                   | 4 [109-110]                                   | The cohort of 20 people...                                                    |
| Outcome data           | 15* | <i>Cohort study</i> —Report numbers of outcome events or summary measures over time                                                                                                                                | 4-9 [194-195 et seq]                          | Of 24 subjects studied .....                                                  |
|                        |     | <i>Case-control study</i> —Report numbers in each exposure category, or summary measures of exposure                                                                                                               |                                               |                                                                               |
|                        |     | <i>Cross-sectional study</i> —Report numbers of outcome events or summary measures                                                                                                                                 |                                               |                                                                               |
| Main results           | 16  | (a) Give unadjusted estimates and, if applicable, confounder-adjusted estimates and their precision (eg, 95% confidence interval). Make clear which confounders were adjusted for and why they were included       | 4-9 [206-195 et seq]                          | In the T2D group mean body weight.....                                        |
|                        |     | (b) Report category boundaries when continuous variables were categorized                                                                                                                                          |                                               |                                                                               |
|                        |     | (c) If relevant, consider translating estimates of relative risk into absolute risk for a meaningful time period                                                                                                   |                                               |                                                                               |

Continued on next page

|                          |    |                                                                                                                                                                            |                          |                                                                         |
|--------------------------|----|----------------------------------------------------------------------------------------------------------------------------------------------------------------------------|--------------------------|-------------------------------------------------------------------------|
| Other analyses           | 17 | Report other analyses done—eg analyses of subgroups and interactions, and sensitivity analyses                                                                             |                          |                                                                         |
| <b>Discussion</b>        |    |                                                                                                                                                                            |                          |                                                                         |
| Key results              | 18 | Summarise key results with reference to study objectives                                                                                                                   | 14 [404-406 and 409-418] | The Personal Fat Threshold Hypothesis ....<br>Clinical Perspectives ... |
| Limitations              | 19 | Discuss limitations of the study, taking into account sources of potential bias or imprecision. Discuss both direction and magnitude of any potential bias                 | 14 [289-303]             | Limitations of the present.....                                         |
| Interpretation           | 20 | Give a cautious overall interpretation of results considering objectives, limitations, multiplicity of analyses, results from similar studies, and other relevant evidence | 10 [199-224]             | The ReTUNE study confirms ....                                          |
| Generalisability         | 21 | Discuss the generalisability (external validity) of the study results                                                                                                      | 13 [389-403]             | Limitations ....                                                        |
| <b>Other information</b> |    |                                                                                                                                                                            |                          |                                                                         |
| Funding                  | 22 | Give the source of funding and the role of the funders for the present study and, if applicable, for the original study on which the present article is based              | 15 [439-441]             | The study was funded .....                                              |

\*Give information separately for cases and controls in case-control studies and, if applicable, for exposed and unexposed groups in cohort and cross-sectional studies.

**Note:** An Explanation and Elaboration article discusses each checklist item and gives methodological background and published examples of transparent reporting. The STROBE checklist is best used in conjunction with this article (freely available on the Web sites of PLoS Medicine at <http://www.plosmedicine.org/>, Annals of Internal Medicine at <http://www.annals.org/>, and Epidemiology at <http://www.epidem.com/>). Information on the STROBE Initiative is available at [www.strobe-statement.org](http://www.strobe-statement.org).

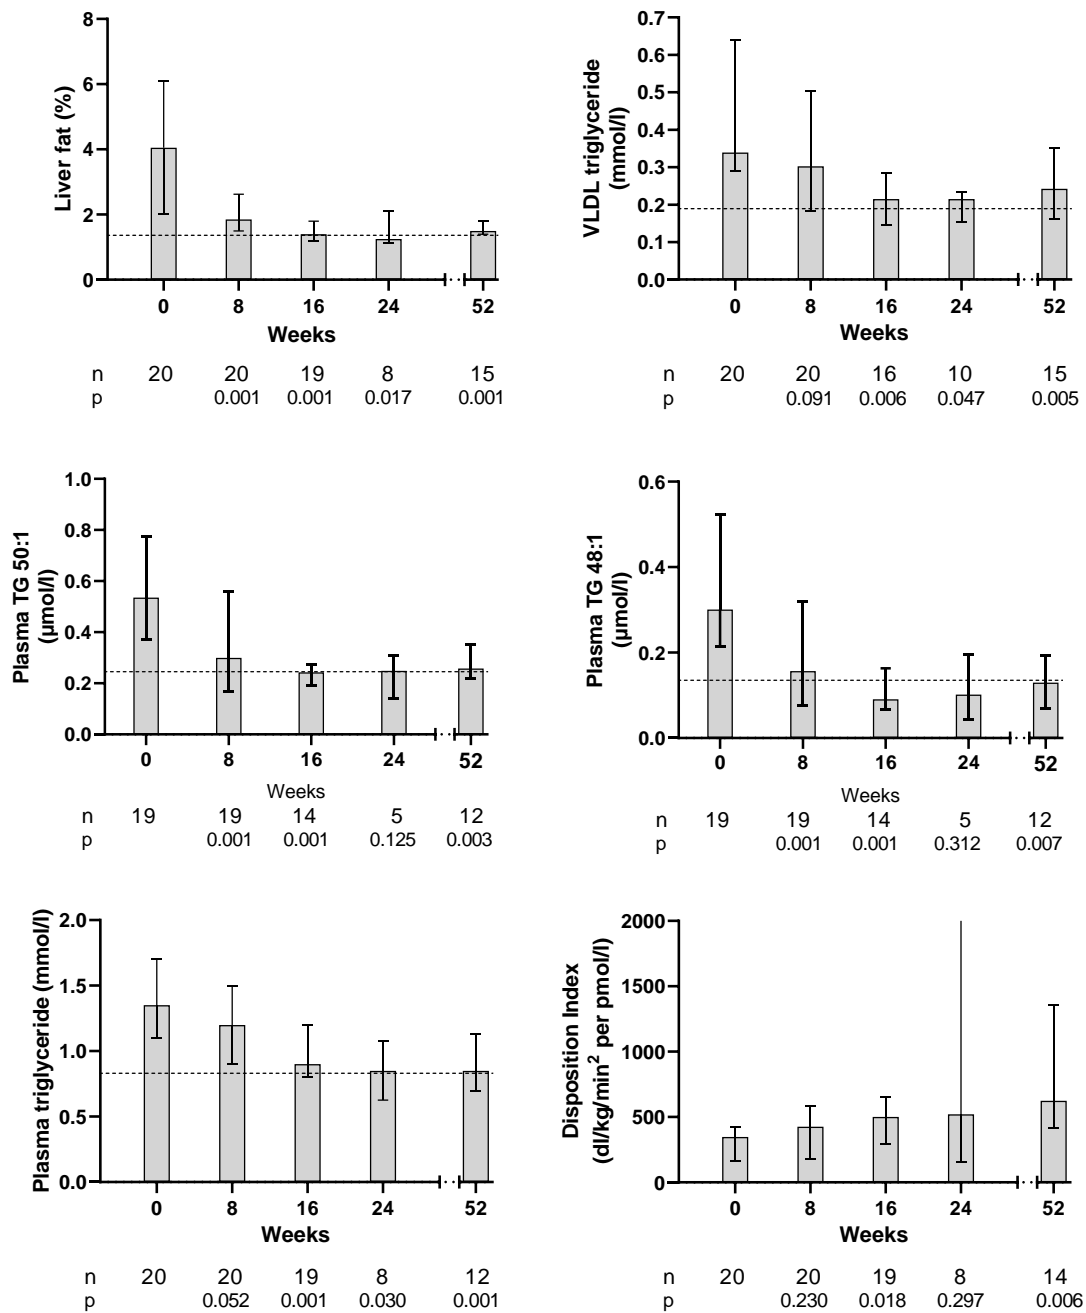

**Figure S1**

Time sequence of change in major pathophysiologic factors. Data are median (IQR) with number of participants at each data point and statistical significance compared with baseline. Correction for multiple testing did not cause loss of significant difference.

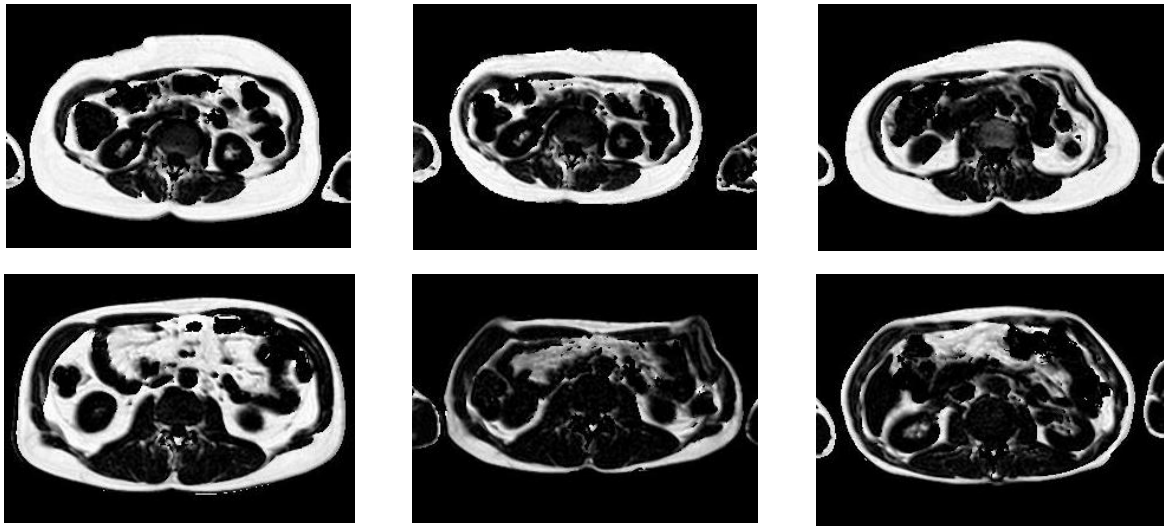

**Figure S2:**

Fat fraction maps of the abdomen at L2/3 level derived from Dixon MRI scans. The change in visceral fat in the T2D participants is demonstrated. Fat is shown in white, and the decrease in fat inside the visceral cavity induced by weight loss can be appreciated. Top row: (*left*) Female T2D participant at baseline (BMI 24.3) and (*centre*) 12 months (BMI 22.2); (*right*) Female control (BMI 22.2). Bottom row: (*left*) Male T2D participant at baseline (BMI 26.0) and (*centre*) 12 months (BMI 23.2);(*right*) Male control (BMI 21.2).

**Table S1:** Change in NEFA (mmol/l; mean±SEM) during the standard meal test (time in minutes from start of meal). For each time point of the meal test statistical significance is shown compared with the baseline (B0) meal test data.

| <b>Time</b>     | <b>-15</b>           | <b>30</b>            | <b>90</b>            | <b>180</b>           |
|-----------------|----------------------|----------------------|----------------------|----------------------|
| <b>Baseline</b> | 0.72±0.04            | 0.56±0.02            | 0.18±0.02            | 0.13±0.05            |
| <b>8 weeks</b>  | 0.60±0.05<br>p=0.077 | 0.57±0.05<br>p=0.844 | 0.17±0.02<br>p=0.581 | 0.10±0.01<br>p=0.059 |
| <b>16 weeks</b> | 0.61±0.04<br>p=0.185 | 0.55±0.04<br>p=0.948 | 0.17±0.02<br>p=0.503 | 0.12±0.02<br>p=0.579 |
| <b>24 weeks</b> | 0.82±0.13<br>p=0.732 | 0.55±0.07<br>p=0.999 | 0.14±0.02<br>p=0.469 | 0.22±0.15<br>p=0.448 |
| <b>52 weeks</b> | 0.57±0.04<br>p=0.155 | 0.48±0.05<br>p=0.449 | 0.16±0.03<br>p=0.020 | 0.10±0.01<br>p=0.446 |

**Table S2:** Baseline clinical characteristics of those who achieved diabetes remission compared with those who did not (mean±SD). No glucose lowering agents apart from metformin and gliclazide were being taken at baseline.

|                                           | <b>Remission group<br/>(n=14)</b> | <b>Non-remission<br/>group (n=6)</b> | <b>p</b> |
|-------------------------------------------|-----------------------------------|--------------------------------------|----------|
| Age (years)                               | 59.0±7.0                          | 59.0±7.5                             | 0.990    |
| Sex (F/M)                                 | 8/6                               | 5/1                                  | 0.260    |
| Weight (kg)                               | 74.5 ±13.8                        | 65.6±6.0                             | 0.152    |
| BMI (kg/m <sup>2</sup> )                  | 25.1±1.7                          | 24.1±1.7                             | 0.275    |
| Ethnicity:                                |                                   |                                      |          |
| White European                            | 11                                | 5                                    | 0.861    |
| Asian                                     | 2                                 | 1                                    |          |
| Middle Eastern                            | 1                                 | 0                                    |          |
| Known duration of diabetes (years)        | 2.5±2.1                           | 3.4±1.4                              | 0.322    |
| 1 <sup>st</sup> degree family history (n) | 8                                 | 3                                    | 0.861    |
| HbA <sub>1c</sub> (mmol/mol)              | 54±7                              | 54.0±4                               | 0.981    |
| HOMA_IR                                   | 2.02(1.51-3.24)                   | 1.74(1.06-4.35)                      | 0.621    |
| Glucose-lowering agents (n)               | Metformin 5<br>Gliclazide 1       | Metformin 5<br>Gliclazide 1          | 0.100    |
| Systolic BP (mmHg)                        | 133±4                             | 123±6                                | 0.137    |
| Diastolic BP (mmHg)                       | 77±3                              | 67±3                                 | 0.035    |
| One antihypertensive                      | 3                                 | 0                                    | 0.143    |
| Two antihypertensives                     | 1                                 | 0                                    |          |

**Table S3:** Composition of average daily food intake over 3 days (2 weekdays and 1 weekend day) during final 2 weeks of each stage as self-reported using Intake24. Compliance with completing the diaries decreased during the study. Data are mean and SEM. For each timepoint statistical significance is shown compared with baseline.

|                              | <b>Baseline</b><br>(n=16) | <b>8 weeks</b><br>(n=14) | <b>16 weeks</b><br>(n=8) | <b>24 weeks</b><br>(n=4) | <b>52 weeks</b><br>(n=8) |
|------------------------------|---------------------------|--------------------------|--------------------------|--------------------------|--------------------------|
| Energy (kcal/day)            | 1463.5±118.2              | 1197 ± 110<br>p=0.0116   | 1065±172<br>p=0.0185     | 684±246<br>p=0.1344      | 1108±118<br>p=0.0192     |
| Protein (g/day)              | 61.8±4.3                  | 59.8±5.9<br>p=0.4734     | 55.6±7.8<br>p=0.1570     | 60.8±3.0<br>p=0.7001     | 58.4±5.1<br>p=0.2622     |
| Carbohydrate (g/day)         | 159.6±3.0                 | 112.2±5.3<br>p=0.0001    | 104.8±5.5<br>p=0.0038    | 95.3±28.0<br>p=0.0886    | 126.0±6.8<br>p=0.0273    |
| Fat (g/day)                  | 60.6±6.3                  | 54.7±7.0<br>p=0.2575     | 44.7±10.7<br>p=0.1293    | 40.3±6.4<br>p=0.2206     | 41.0±4.5<br>p=0.0524     |
| Saturated Fat (g/day)        | 21.7±2.9                  | 17.3±2.6<br>p=0.1829     | 13.0±2.7<br>p=0.0537     | 11.2±2.0<br>p=0.0728     | 10.9±2.1<br>p=0.0123     |
| Cis Mono-unsaturated (g/day) | 21.5±2.7                  | 21.1±3.2<br>p=0.6371     | 18.0±5.2<br>p=0.4004     | 15.1±2.4<br>p=0.4440     | 16.0±1.8<br>p=0.1601     |
| Cis Poly-unsaturated (g/day) | 9.6±1.2                   | 10.6±1.2<br>p=0.9503     | 9.5±2.5<br>p=0.7295      | 9.7±2.4<br>p=0.8787      | 9.9±1.1<br>p=0.7011      |
| Fibre (Englyst) (g/day)      | 12.8±1.4                  | 13.8±2.0<br>p=0.8864     | 13.5±1.9<br>p=0.3382     | 11.7±2.2<br>p=0.8546     | 14.1±4.3<br>p=0.8815     |
| Trans FA (g/day)             | 0.8±0.1                   | 0.7±0.1<br>p=0.3258      | 0.6±0.1<br>p=0.1802      | 0.6±0.1<br>p=0.1142      | 0.3±0.1<br>p=0.0225      |
| Fruit portions (n)           | 1.0±0.3                   | 2.0±0.5<br>p=0.1323      | 1.1±0.6<br>p=0.5529      | 0.6±0.5<br>p=0.0309      | 1.9±0.7<br>p=0.2105      |
| Vegetable portions (80g) (n) | 1.7±0.3                   | 2.6±0.5<br>p=0.0066      | 2.7±0.7<br>p=0.1579      | 2.8±0.3<br>p=0.0632      | 2.5±0.8<br>p=0.3148      |
